# Supplementary material for: Deep eutectic solvothermal NiS2/CdS synthesis for the visible-light-driven valorization of the biomass intermediate 5-hydroxymethylfurfural (HMF) integrated with H2 production
Source: Royal Society of Chemistry journal article supplement (doi:10.1039/d2gc04535d), 2023-01-01
Supplement: d2gc04535d1.pdf [file d2gc04535d1.pdf]

# Supporting Information

## Deep eutectic solvothermal synthesis NiS<sub>2</sub>/CdS for visible light driven valorization of biomass intermediate 5-hydroxymethylfurfural (HMF) integrated with H<sub>2</sub> Production

Shuzi Liu,<sup>a</sup> Baolong Zhang,<sup>a</sup> Zhaohui Yang,<sup>a</sup> Zhimin Xue<sup>\*b</sup>, Tiancheng Mu<sup>\*a</sup>

### 1. Experimental Section

#### 1.1. Synthesis of sulfides nanostructures

Synthesis of NiS<sub>2</sub>/CdS: NiS<sub>2</sub>/CdS composite was prepared using the same procedure as shown in Fig. 1, except with Cd(Ac)<sub>2</sub>·2H<sub>2</sub>O and Ni(NO<sub>3</sub>)<sub>2</sub>·6H<sub>2</sub>O both as metal precursors. The resulting solid was denoted as x% NiS<sub>2</sub>/CdS, where x represents the calculated mole fraction of NiS<sub>2</sub>.

Synthesis of NiS<sub>2</sub>: Peony-like NiS<sub>2</sub> nanosheets were prepared using the same procedure, except with Ni(NO<sub>3</sub>)<sub>2</sub>·6H<sub>2</sub>O (0.001 mol) as metal precursor.

Synthesis of NiS<sub>2</sub>+CdS: NiS<sub>2</sub>+CdS was prepared by two-step method. The as-prepared CdS (0.01 mol) was dispersed into PEG-based DES with Ni(NO<sub>3</sub>)<sub>2</sub>·6H<sub>2</sub>O (0.001 mol), and the following operation method was exactly the same as mentioned above to obtain the precipitate (10 % NiS<sub>2</sub>+CdS).

#### 1.2. Characterization of photocatalysts

The X-ray powder diffraction (XRD) patterns of the products were recorded on D/max-2550/PC diffractometer (Rigaku) at 40 kV and 30 mA with Cu K $\alpha$  as X-ray ( $\lambda = 1.5418\text{\AA}$ ). SEM images, EDS spectra and elemental mapping images of the samples were obtained using a Hitachi SU 8010 field emission scanning electron microscope combined with energy dispersive X-ray spectroscopy at 15.0 kV. X-ray photoelectron spectroscopy (XPS) was carried out on an ESCALAB MK X-ray photoelectron spectrometer. The morphological and microstructural features of the samples were recorded by high-resolution transmission electron microscopy (HRTEM JEOL-2010). The diffuse reflectance spectra at room temperature were obtained using a UV-vis spectrophotometer (Hitachi U-4100) with BaSO<sub>4</sub> as a reflectance standard. The specific surface areas were analyzed using the BET method using the nitrogen adsorption-desorption instrument (JW-BK122W, China). Steady-state photoluminescence (PL) spectra and PL decay were performed using an Edinburgh FLS 980 transient steady-state spectrometer with a 375-nm laser. The carbon-centered radicals were detected on an electron paramagnetic resonance (EPR, Bruker EMXnano, Bruker, Germany).

### **1.3. Density functional theory (DFT) calculations**

All the DFT calculations were carried out in the Vienna *ab initio* simulation (VASP5.4.4) code.<sup>1</sup> The exchange-correlation is simulated with PBE functional and the ion-electron interactions were described by the PAW method.<sup>2, 3</sup> The vdWs interaction was included by using empirical DFT-D3 method.<sup>4</sup> The Monkhorst-Pack-grid-mesh-based

Brillouin zone k-points are set as  $2 \times 2 \times 1$  for  $\text{NiS}_2$  and  $\text{CdS@NiS}_2$ , while  $3 \times 3 \times 1$  for CdS periodic structure with the cutoff energy of 450 eV. The convergence criteria are set as  $0.01 \text{ eV \AA}^{-1}$  and  $10^{-5} \text{ eV}$  in force and energy, respectively. A at least  $20 \text{ \AA}$  vacuum layer along the z direction is employed to avoid interlayer interference.

#### **1.4. Electrochemical measurements**

The electrochemical experiments analysis was performed using electrochemical workstation (Shanghai ChenHua Instrument Company). The counter electrode was made of platinum wire, and the reference electrode was made of Ag/AgCl in a saturated potassium chloride solution. The sample slurry was coated on an ITO glass substrate (the fixed area of ITO was  $1.1 \text{ cm}^2$ ), and then the film was air-dried overnight to prepare a thin-film working electrode.  $\text{Na}_2\text{SO}_4$  aqueous solution (1.0 M) was used as the electrolyte for measurements, and a 3 W monochromatic light source ( $\lambda = 420 \text{ nm}$ ) was the visible light source. Mott-Schottky analysis was in the potential range from 0 to 1.0 V (vs Ag/AgCl) with a frequency of 1kHz in the dark.

#### **1.5. Electron paramagnetic resonance measurement**

A 10 mg sample was scattered in 20 mL of HMF aqueous solution (0.1 M) containing a radical spin-trapping agent-5,5-dimethyl-1-pyrroline N-oxide (DMPO, 0.1 M). The suspension-filled glass capillary was placed in a sealed glass tube under an Ar

environment, and then placed in the microwave cavity of the EPR spectrometer, and irradiated at room temperature with a xenon lamp (420 nm).

## 2. Results and Discussion

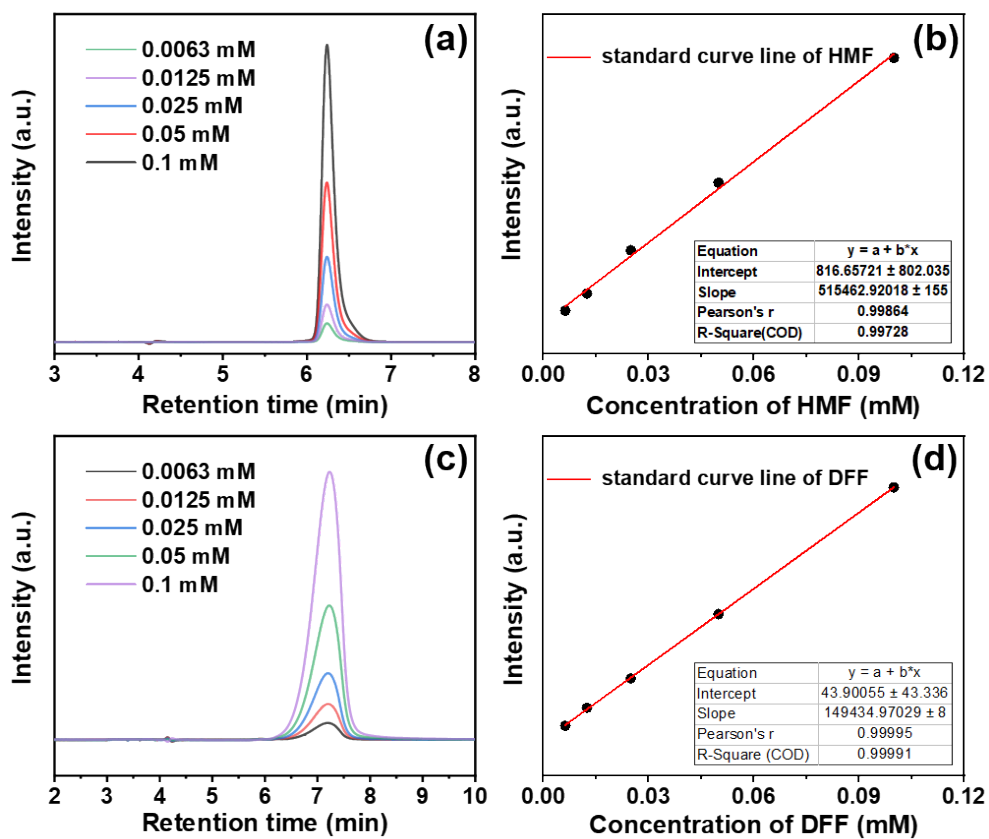

Fig. S1. HPLC measurements of HMF (a) and DFF (c); Standard curves of the HPLC for HMF (b) and DFF (d).

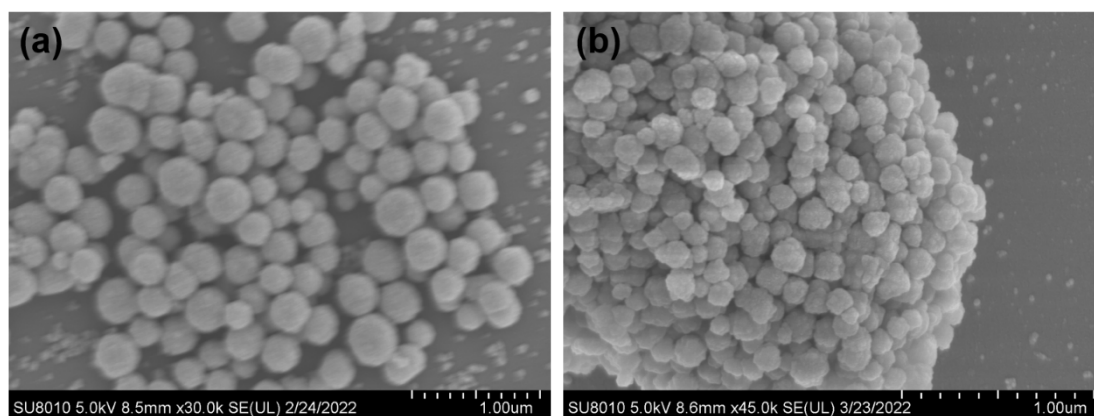

Fig. S2. SEM images of pure CdS (a) and 10 % NiS<sub>2</sub>/CdS (b)

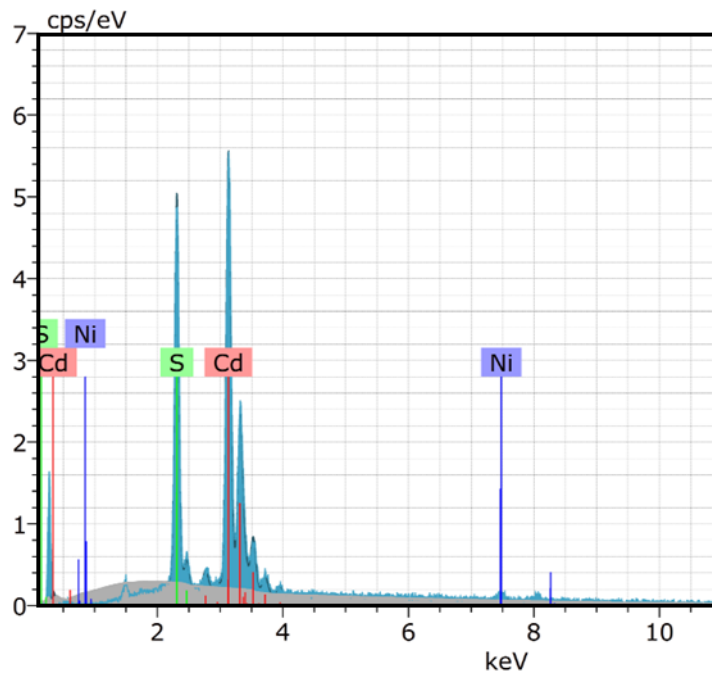

**Fig. S3.** EDS quantitative analysis of the as-prepared 10% NiS<sub>2</sub>/CdS.

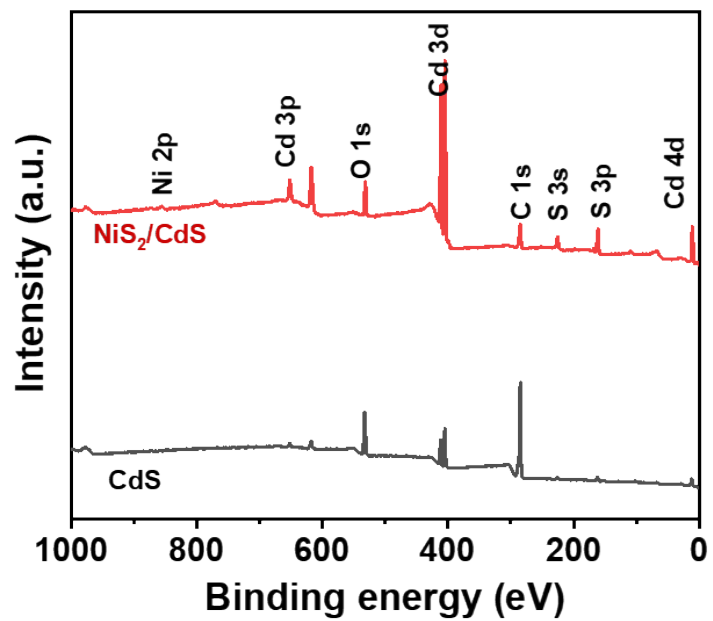

**Fig. S4.** XPS surface survey spectra of bare CdS and 10 % NiS<sub>2</sub>/CdS

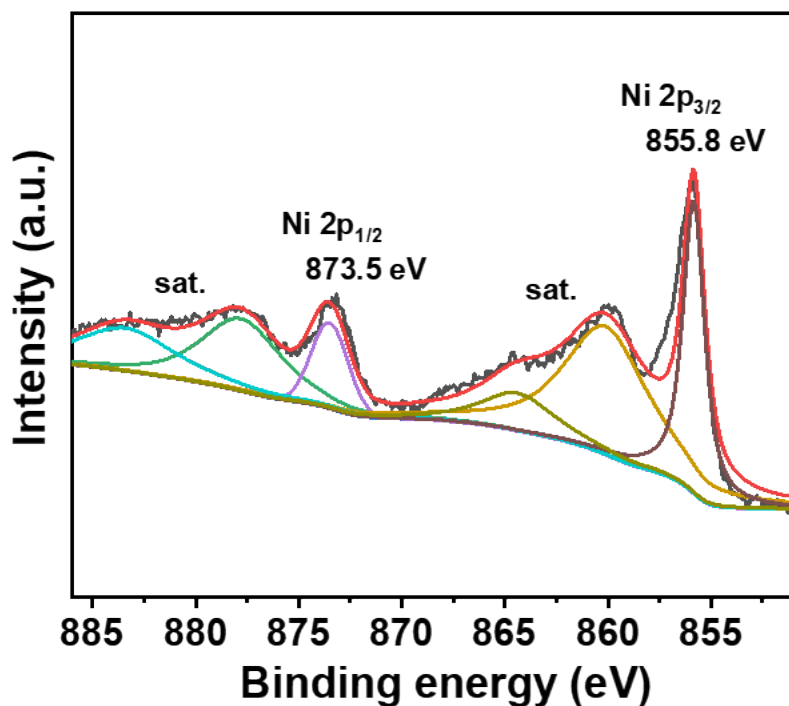

Fig. S5. Ni 2p spectrum of pristine NiS<sub>2</sub>.

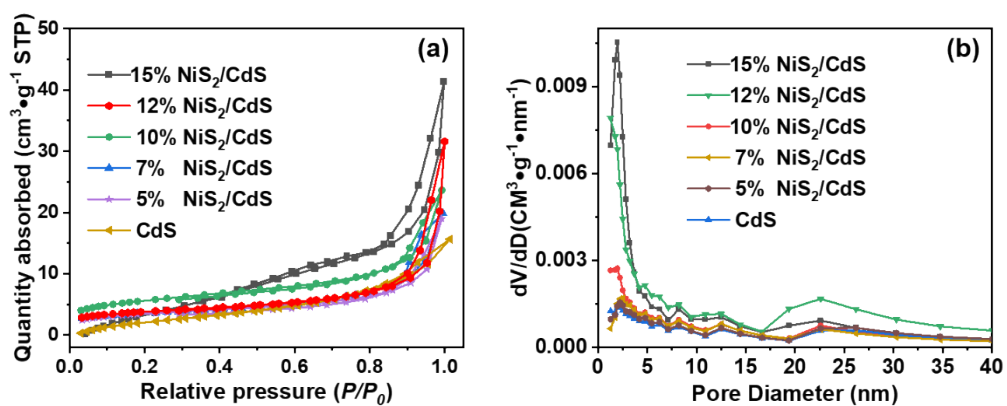

Fig. S6. N<sub>2</sub> adsorption–desorption isotherms (a) and pore-size distribution (b) of CdS and x% NiS<sub>2</sub>/CdS.

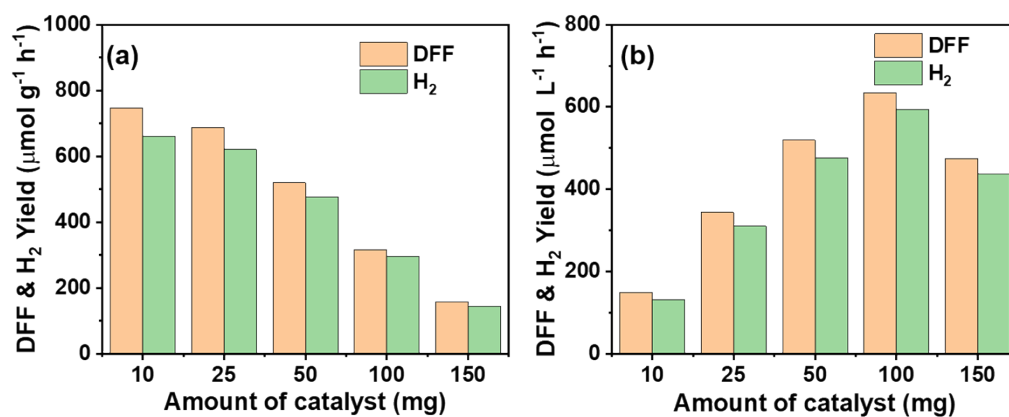

**Fig. S7.** Photocatalytic rates were measured on a per-unit-mass basis (a) and per-unit-volume basis(b).

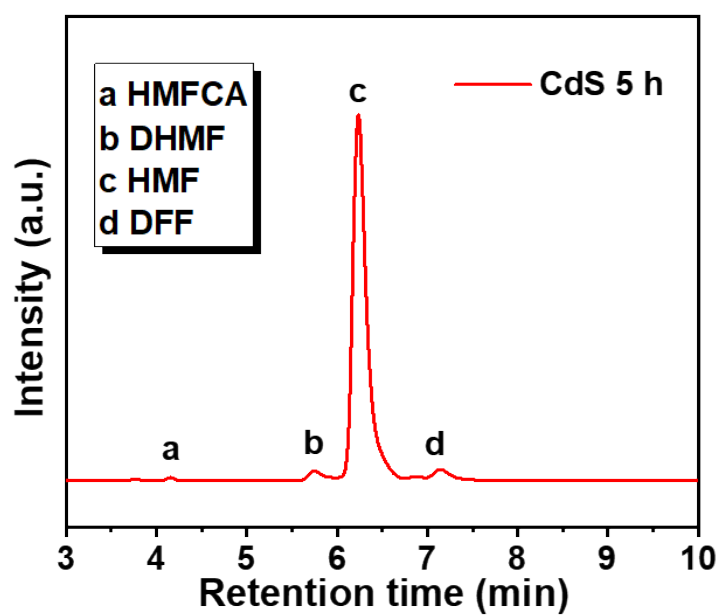

**Fig. S8.** HPLC traces of photocatalytic oxidation of HMF by CdS under visible light irradiation.



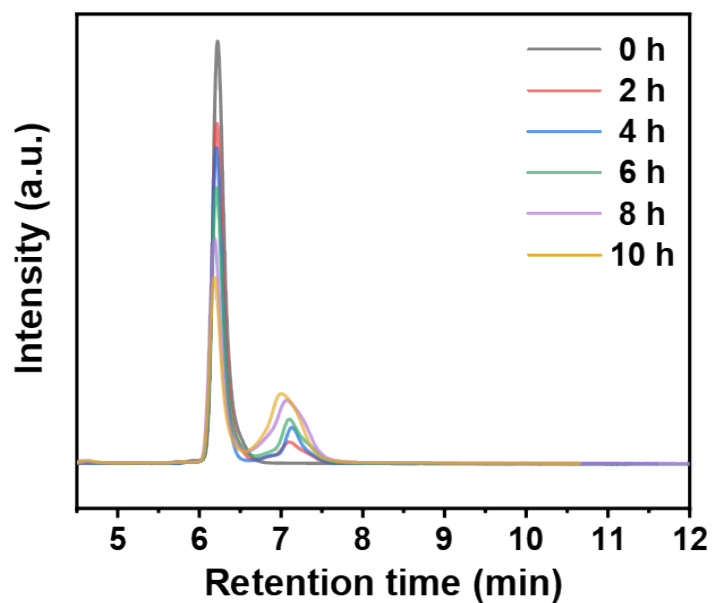

**Fig. S9.** HPLC traces of photocatalytic oxidation of HMF by 10% NiS<sub>2</sub>/CdS.

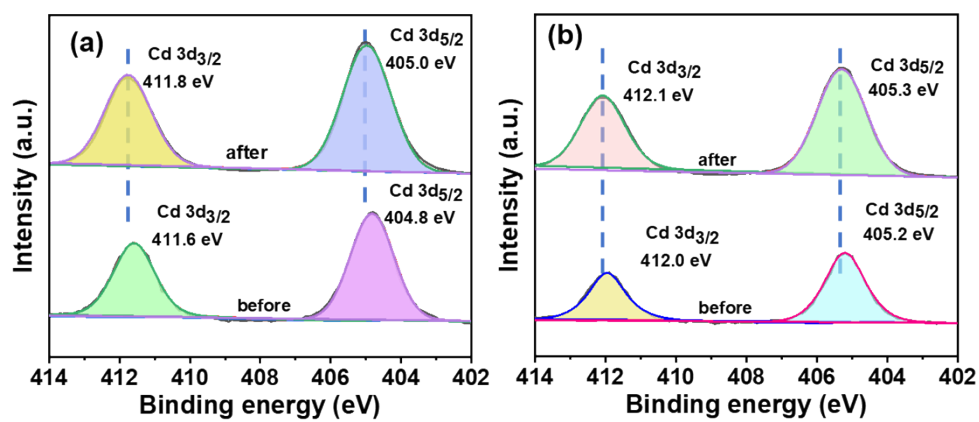

**Fig. S10.** Binding energy shift of Cd 3d in pure CdS (a) and 10% NiS<sub>2</sub>/CdS (b) composite before and after photostability test.

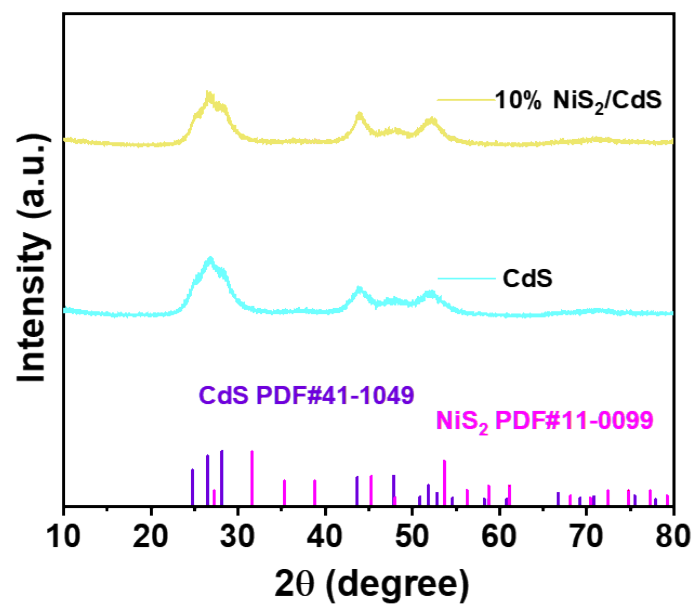

**Fig. S11.** XRD patterns of CdS and 10% NiS<sub>2</sub>/CdS after photocatalysis.

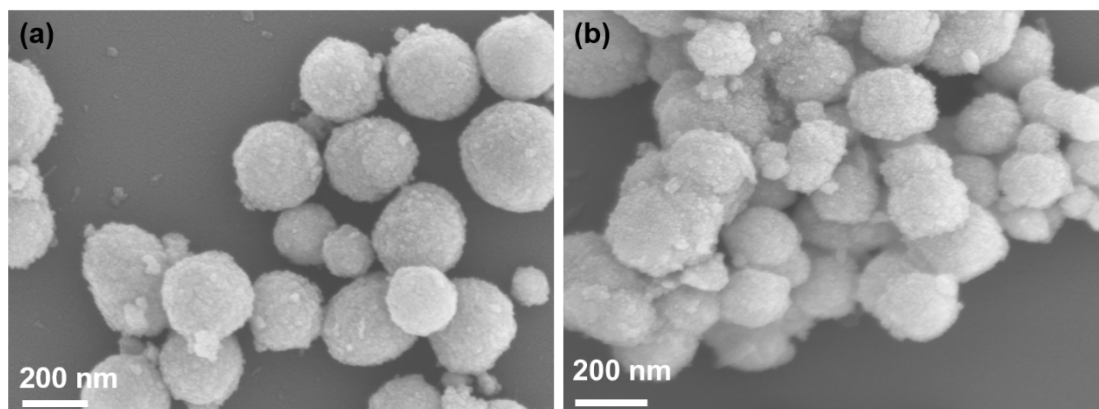

**Fig. S12.** SEM images of CdS (a) and 10% NiS<sub>2</sub>/CdS (b) after photocatalysis.

**Table S1.** Results of the photocatalytic oxidation of HMF under both similar and different conditions.

| PhotoCatalyst                                      | Solvents                                    | Reaction conditions                                     | Products            | Yield rate of DFF ( $\mu\text{mol g}^{-1} \text{h}^{-1}$ ) | Selectivity % | Ref.          |
|----------------------------------------------------|---------------------------------------------|---------------------------------------------------------|---------------------|------------------------------------------------------------|---------------|---------------|
| NiS <sub>2</sub> /CdS                              | water                                       | ( $\lambda > 420 \text{ nm}$ ),<br>under N <sub>2</sub> | DFF, H <sub>2</sub> | 519.6                                                      | 95.2          | This work     |
| g-C <sub>3</sub> N <sub>4</sub>                    | water                                       | ( $\lambda > 420 \text{ nm}$ ),<br>under N <sub>2</sub> | DFF, H <sub>2</sub> | 95.0                                                       | 97.0          | <sup>5</sup>  |
| NiS/Zn <sub>3</sub> In <sub>2</sub> S <sub>6</sub> | Water                                       | ( $\lambda > 400 \text{ nm}$ ),<br>under N <sub>2</sub> | DFF, H <sub>2</sub> | 120.0                                                      | 94.1          | <sup>6</sup>  |
| CdxInyS(x+1.5y)                                    | water                                       | ( $\lambda > 420 \text{ nm}$ ),<br>under air            | DFF,<br>FDCA        | --                                                         | 62.7          | <sup>7</sup>  |
| CuSAs/p-CNS                                        | acetonitrile<br>(90%)<br>solution           | ( $\lambda = 455 \text{ nm}$ ),<br>under O <sub>2</sub> | DFF                 | --                                                         | 85.6          | <sup>8</sup>  |
| Ag/TiO <sub>2</sub>                                | Na <sub>2</sub> CO <sub>3</sub><br>solution | ( $\lambda > 420 \text{ nm}$ ),<br>under O <sub>2</sub> | HMFCFA              | --                                                         | 96.7          | <sup>9</sup>  |
| SGH-TiO <sub>2</sub>                               | acetonitrile                                | ( $\lambda = 515 \text{ nm}$ ),<br>under air            | DFF                 | --                                                         | 87.0          | <sup>10</sup> |
| MAPbBr <sub>3</sub>                                | acetonitrile                                | ( $\lambda = 450 \text{ nm}$ ),<br>under air            | DFF                 | --                                                         | 90.0          | <sup>11</sup> |

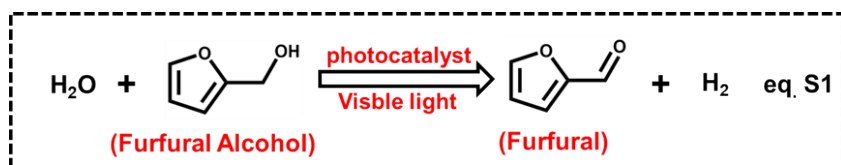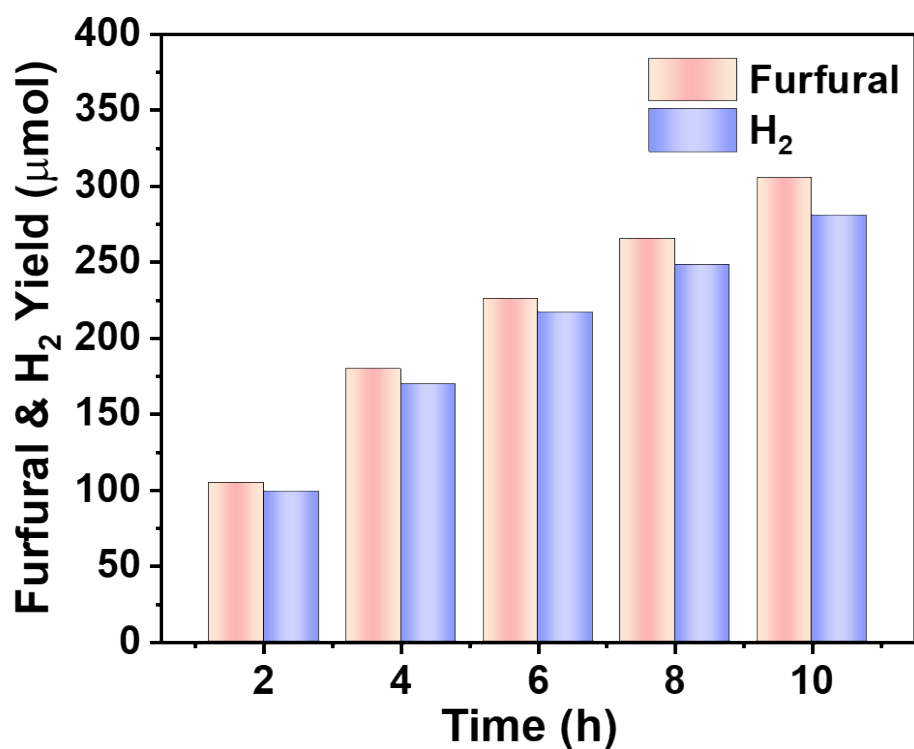

**Fig. S13.** Time-online photocatalytic selective transformation of furfural alcohol activity over the 10 % NiS<sub>2</sub>/CdS sample.

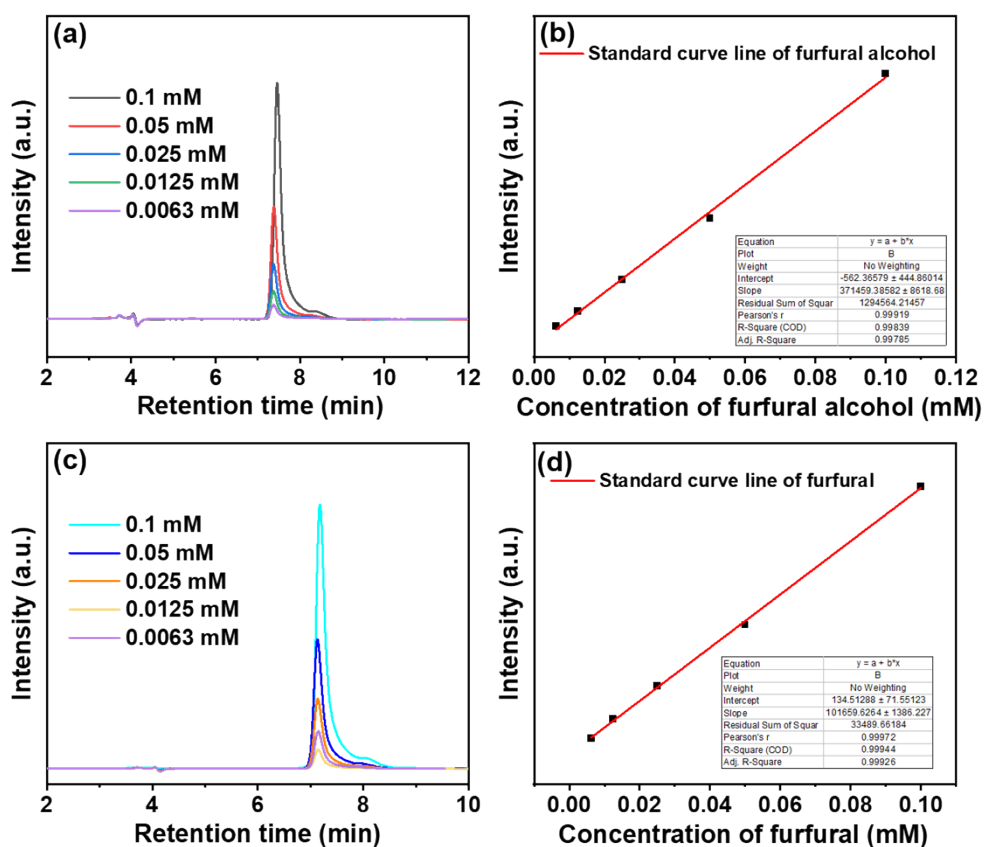

**Fig. S14.** HPLC measurements of furfural alcohol (a) and furfural (c); Standard curves of the HPLC for furfural alcohol (b) and furfural (d).

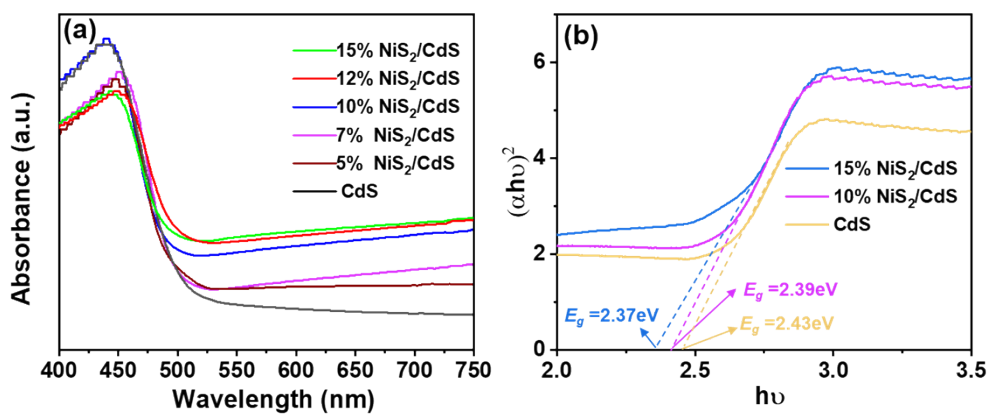

**Fig. S15.** UV-vis DRS spectra (a) and Kubelka-Munk-transformed reflectance spectra (b) of CdS and x% NiS<sub>2</sub>/CdS samples.

**Table S2.** Band Gap ( $E_g$ ) of 5 % NiS<sub>2</sub>/CdS, 7 % NiS<sub>2</sub>/CdS, 12 % NiS<sub>2</sub>/CdS.

| Sample                    | $E_g$ (eV) |
|---------------------------|------------|
| 5% NiS <sub>2</sub> /CdS  | 2.42 eV    |
| 7% NiS <sub>2</sub> /CdS  | 2.41 eV    |
| 12% NiS <sub>2</sub> /CdS | 2.38 eV    |

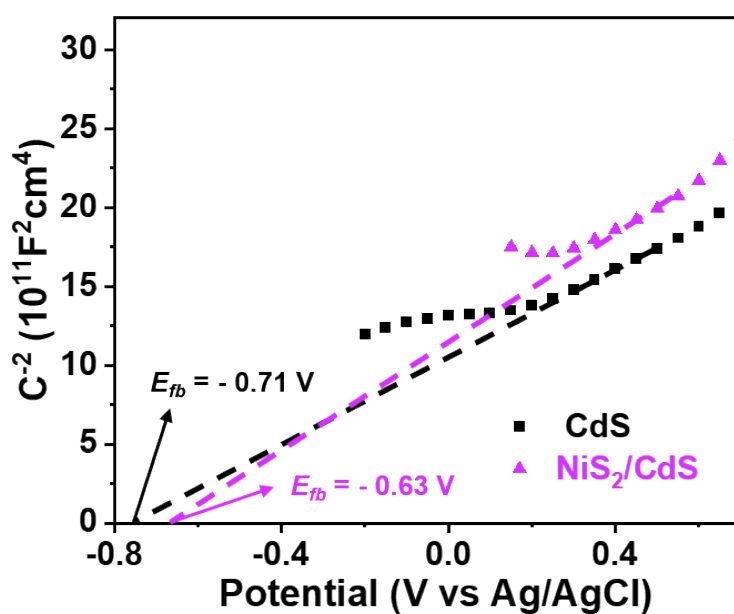

**Fig. S16.** Plots of transformed Kubelka-Munk function versus photon energy for CdS and NiS<sub>2</sub>/CdS.

**Table S3.** Time-resolved photoluminescence decay parameters of pure CdS and 10 % NiS<sub>2</sub>/CdS

| Sample                | Lifetime ( $\tau$ ) (ns) |          | Pre-exponential factor A% |       | $\tau_{ave}$<br>(ns) |
|-----------------------|--------------------------|----------|---------------------------|-------|----------------------|
|                       | $\tau_1$                 | $\tau_2$ | $A_1$                     | $A_2$ |                      |
| CdS                   | 1.06                     | 9.05     | 95.82                     | 5.20  | 3.58                 |
| NiS <sub>2</sub> /CdS | 0.64                     | 3.83     | 84.58                     | 18.43 | 2.45                 |

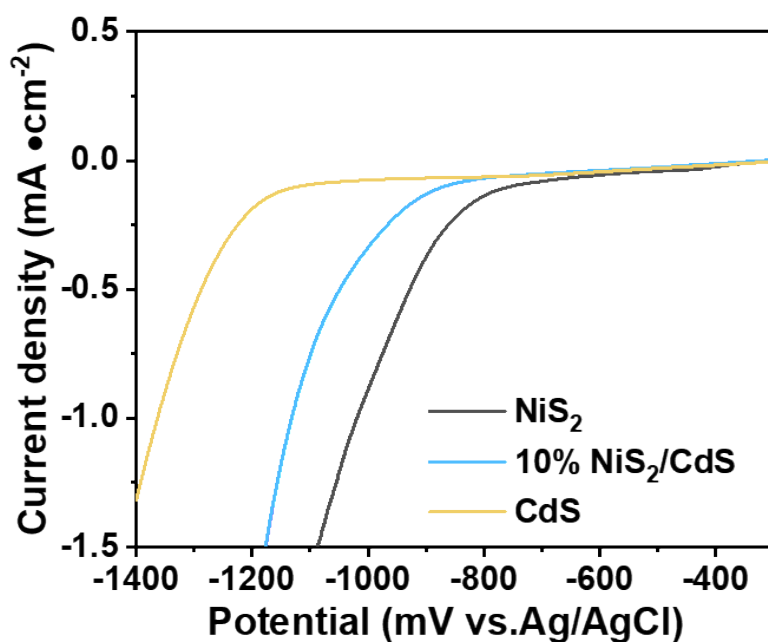

Fig. S17. LSV polarization curves.

#### References

1. G. Kresse and J. Furthmuller, *Phys. Rev. B*, 1996, **54**, 11169.
2. J. P. Perdew, K. Burke and M. Ernzerhof, *Phys. Rev. Lett.*, 1996, **77**, 3865.
3. B. Hammer, L. B. Hansen and J. K. Norskov, *Phys. Rev. B*, 1999, **59**, 7413.
4. S. Grimme, *J. Comput. Chem.*, 2006, **27**, 1787-1799.
5. X. Bao, M. Liu, Z. Wang, D. Dai, P. Wang, H. Cheng, Y. Liu, Z. Zheng, Y. Dai and B. Huang, *ACS Catalysis*, 2022, **12**, 1919-1929.
6. S. G. Meng, H. H. Wu, Y. J. Cui, X. Z. Zheng, H. Wang, S. F. Chen, Y. X. Wang and X. L. Fu, *Appl. Catal., B*, 2020, **266**, 118617.
7. M. Zhang, Z. Yu, J. Xiong, R. Zhang, X. Liu and X. Lu, *Appl. Catal., B*, 2022, **300**, 120738.
8. G. Wang, R. Huang, J. Zhang, J. Mao, D. Wang and Y. Li, *Adv. Mater.*, 2021, **33**, e2105904.
9. W. Zhang, X. Li, S. Liu, J. Qiu, J. An, J. Yao, S. Zuo, B. Zhang, H. Xia and C. Li, *ChemSusChem.*, 2022, **15**, 202102158.
10. A. Khan, M. Goepel, A. Kubas, D. Lomot, W. Lisowski, D. Lisovytskiy, A. Nowicka, J. C. Colmenares and R. Glaser, *ChemSusChem.*, 2021, **14**, 1351-1362.
11. M. Zhang, Z. Li, X. Xin, J. Zhang, Y. Feng and H. Lv, *ACS Catal.*, 2020, **10**, 14793-14800.
